# Supplementary material for: A novel chimeric CYP11B2/CYP11B1 combined with a new p.L340P CYP11B1 mutation in a patient with 11OHD: case report
Source: Springer Nature journal article supplement (doi:10.1186/s12902-018-0249-z), 2018-04-26
Supplement: MOESM1 [file 15725510]

Supplemental Table 1 The laboratory and endocrinological evaluation of the proband pre- and post- treatment.

| Parameter                     | Diagnosis | Months after therapy |          |           |           | Reference Range |
|-------------------------------|-----------|----------------------|----------|-----------|-----------|-----------------|
|                               |           | 4 months             | 9 months | 20 months | 28 months |                 |
| <b>Laboratory examination</b> |           |                      |          |           |           |                 |
| Potassium (mmol/L)            | 2.62      | 3.03                 | 3.02     | 3.34      | 4.59      | 3.5-5.3         |
| Sodium (mmol/L)               | 144.8     | 144.9                | 141.3    | 144.7     | 137.4     | 137-147         |
| Chlorine (mmol/L)             | 105.2     | 106.5                | 106.5    | 106.1     | 103.5     | 99-110          |
| Urea (mmol/L)                 | 2.55      | 3.94                 | 2.42     | NA        | NA        | 2.9-8.2         |
| Creatinine (mmol/L)           | 63        | 60.9                 | 75.2     | NA        | NA        | 45-105          |
| ALT (IU/L)                    | 7         | 9.6                  | 25       | NA        | NA        | 9-50            |
| AST (IU/L)                    | 18        | 16.4                 | 16.5     | NA        | NA        | 15-40           |
| TC (mmol/L)                   | 2.65      | NA                   | 3.21     | NA        | NA        | 0-5.2           |
| TG (mmol/L)                   | 0.74      | NA                   | 0.88     | NA        | NA        | 0-1.7           |
| Uric PH                       | 7.5       | 7                    | NA       | NA        | NA        | 5.5-7.5         |
| Plasma PH                     | 7.37      | NA                   | NA       | NA        | NA        | 6.5-7.45        |
| pCO <sub>2</sub> (mmHg)       | 45.7      | NA                   | NA       | NA        | NA        | 35-45           |

| Parameter                          | Diagnosis | Months after therapy |          |           |           | Reference Range    |
|------------------------------------|-----------|----------------------|----------|-----------|-----------|--------------------|
|                                    |           | 4 months             | 9 months | 20 months | 28 months |                    |
| pO <sub>2</sub> (mmHg)             | 99.8      | NA                   | NA       | NA        | NA        | 83-108             |
| UOP (mosm/kg)                      | 317       | 437                  | 314      | NA        | 382       | 600-1000           |
| USG                                | ≤1.005    | 1.01                 | 1.01     | NA        | NA        | 1.015-1.03         |
| WDT UOP<br>(mosm/kg)               | 394       | NA                   | NA       | NA        | NA        | 600-1000           |
| VT UOP (mosm/kg)                   | 427       | NA                   | NA       | NA        | NA        | >429.46            |
| <b>Endocrinological evaluation</b> |           |                      |          |           |           |                    |
| ACTH (ng/L)                        | 210       | 43.1                 | 38.7     | 39.67     | 50.32     | 4.8-48.8           |
| Cortisol (nmol/L)                  | 205.8     | 237.8                | 193.9    | 167.9     | 21.4      | 176.6–579.4 (8 am) |
|                                    | 96.2      | NA                   | NA       | NA        | NA        | 66–353 (4 pm)      |
|                                    | 68.9      | NA                   | NA       | NA        | NA        | <100 (0 am)        |
| 17-KS (umol/24h)                   | 98        | 45                   | NA       | NA        | NA        | 35-87              |
| Aldosterone (pg/ml)                | 99.8      | 99.8                 | 83.6     | 66        | 73.3      | 70-300             |
| PRA (ng/ml/h)                      | 0.02      | 0.02                 | 0.37     | 0.03      | 1.15      | 0.1-6.56           |

| Parameter      | Diagnosis | Months after therapy |          |           |           | Reference Range |
|----------------|-----------|----------------------|----------|-----------|-----------|-----------------|
|                |           | 4 months             | 9 months | 20 months | 28 months |                 |
| UVMA (mg/24h)  | 3.71      | NA                   | NA       | NA        | NA        | <13.6           |
| MN (ng/L)      | 116.9     | NA                   | NA       | NA        | NA        | 12.0-130.0      |
| NMN (ng/L)     | 103.3     | NA                   | NA       | NA        | NA        | 21.1-150.0      |
| FSH (mIU/ml)   | 5.67      | 6.63                 | 8.12     | NA        | NA        | 0.95–11.95      |
| TEST (nmol/L)  | 19.73     | 22.46                | 38.18    | NA        | 33.78     | 4.94-32.01      |
| FT (pg/ml)     | 11.66     | NA                   | 10.41    | NA        | NA        | 0.20-42.50      |
| DHEAS (ug/dl)  | 165.9     | 94.3                 | 55.2     | NA        | NA        | 8.6-169.8       |
| AD (ng/ml)     | >10.3     | 7.98                 | 4.36     | NA        | 0.67      | 0.5-4.8         |
| PROG (ng/ml)   | 2.7       | 2.1                  | 0.3      | NA        | NA        | <0.1–0.2        |
| PRL (ng/ml)    | 8.63      | 8.64                 | 5.65     | NA        | NA        | 3.46–19.4       |
| E2 (pg/ml)     | 50        | 55                   | 50       | NA        | 56        | 11–44           |
| LH (mIU/ml)    | 7.75      | NA                   | NA       | NA        | NA        | 1.14–8.75       |
| 17-OHP (ng/ml) | 18.05     | 6.24                 | 5.51     | NA        | 1.89      | 0.31-2.17       |
| SHBG (nmol/L)  | 25.8      | 36.3                 | 44.6     | NA        | NA        | 17.1-77.6       |

| Parameter    | Diagnosis | Months after therapy |          |           |           | Reference Range |
|--------------|-----------|----------------------|----------|-----------|-----------|-----------------|
|              |           | 4 months             | 9 months | 20 months | 28 months |                 |
| FT3 (pmol/L) | 4.81      | 5.99                 | 3.78     | NA        | NA        | 3.1–6.8         |
| FT4 (pmol/L) | 18.64     | 17.74                | 16.5     | NA        | NA        | 11–22           |
| TSH (mIU/L)  | 2.96      | 4.156                | 0.681    | NA        | NA        | 0.468–4.68      |

*ALT* alanine aminotransferase, *AST* aspartate aminotransferase, *TC* total cholesterol, *TG* triglyceride, *UOP* urine osmotic pressure, *USG* urine specific gravity, *WDT* water deprivation test, *VT* vasopressin test, *ACTH* adrenocorticotrophin, *17-OH* 17-hydroxycorticosteroid, *17-KS* 17-ketosteroid, *PRA* plasma renin activity, *UVMA* urinary vanillymandelic acid, *MN* metadrenaline, *NMN* normetadrenaline, *FSH* follicle-stimulating hormone, *TEST* testosterone, *FT* free testosterone, *DHEAS* dehydroepiandrosterone sulfate, *AD* androstenedione, *PROG* progesterone, *PRL* prolactin, *E2* estradiol, *LH* luteinizing hormone, *17-OHP* 17-hydroxy progesterone, *SHBG* sex hormone binding globulin, *FT3* free triiodothyronine, *FT4* free thyroxine, *TSH* thyroid-stimulating hormone, *PH* potential of hydrogen, *pCO2* partial pressure of carbon dioxide, *pO2* partial pressure of oxygen, *UOP* urine osmotic pressure, *USG* urine specific gravity, *WDT* water-deprivation test, *VT* vasopressin test.
