# Supplementary material for: A novel chimeric CYP11B2/CYP11B1 combined with a new p.L340P CYP11B1 mutation in a patient with 11OHD: case report
Source: Springer Nature journal article supplement (doi:10.1186/s12902-018-0249-z), 2018-04-26
Supplement: MOESM2 [file 15725510]

**Supplemental Table 2 Bioinformatics analysis of free energy alteration of CYP11B1mut**

| <b>Software</b> | <b>Change of free energy (Kcal/mol)</b> | <b>Result</b> |
|-----------------|-----------------------------------------|---------------|
| <b>mCSM</b>     | -1.62                                   | Destablizing  |
| <b>SDM</b>      | -4.85                                   | Destablizing  |
| <b>DUET</b>     | -2.02                                   | Destablizing  |
